# Supplementary material for: Major Co-localized QTL for Plant Height, Branch Initiation Height, Stem Diameter, and Flowering Time in an Alien Introgression Derived Brassica napus DH Population
Source: Front Plant Sci. 2018 Mar 28;9:390. doi: 10.3389/fpls.2018.00390 (PMC5883169; doi:10.3389/fpls.2018.00390)
Supplement: Supplementary file 1 [file Table1.XLSX]

## Sheet: Supplementary Table S1
Supplementary Table S1. Summary of the environments where the parents and DH population were grown
Environment code	Growing season	City of China	Location	Type of rapeseed growing area	Traits measured
15WH	Sept, 2015-May, 2016	Wuhan, Hubei	114.33°E, 30.50°N	Semi winter-type	PH, BIH, SD, FT
15CD	Sept, 2015-May, 2016	Chengdu, Sichuan	104.15°E, 30.83°N	Semi winter-type	PH, BIH, SD, FT
15ER	Sept, 2015-May, 2016	Ezhou, Hubei	114.67°E, 30.08°N	Semi winter-type	PH, BIH, SD
16WH	Sept, 2016-May, 2017	Wuhan, Hubei	114.33°E, 30.50°N	Semi winter-type	PH, SD, FT
16XN	May, 2016-Sept, 2016	Xining, Qinghai	101.77°E, 36.67°N	Spring-type	PH, BIH, FT
17WN	May, 2017-Sept, 2017	Weining, Guizhou	104.30°E, 26.83°N	Spring-type	PH, BIH, SD, FT
